# Supplementary material
Source: MDPI journal article supplement (https://www.mdpi.com/1424-8247/14/10/998)

**A**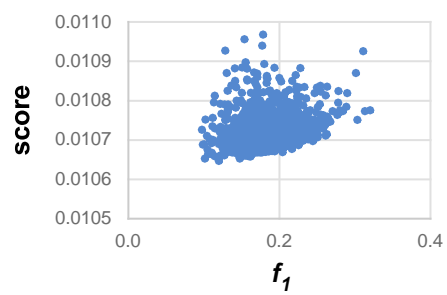**B**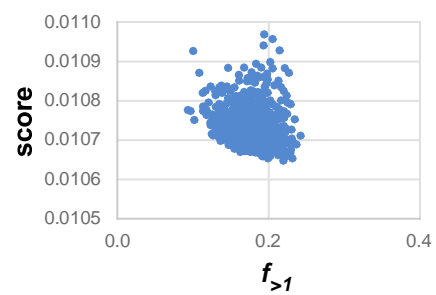**C**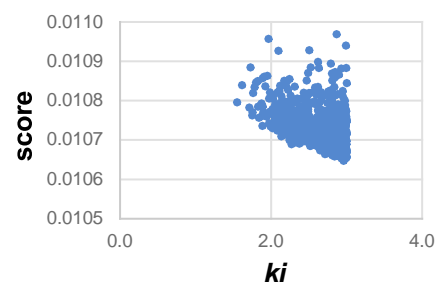**D**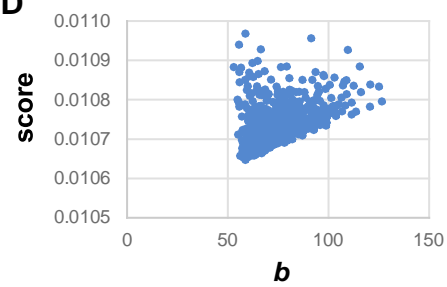**E**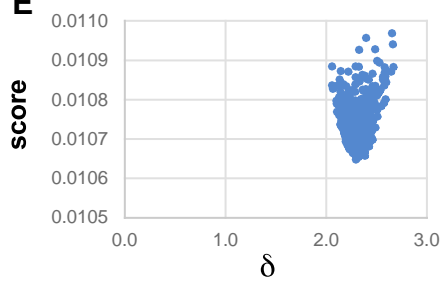**F**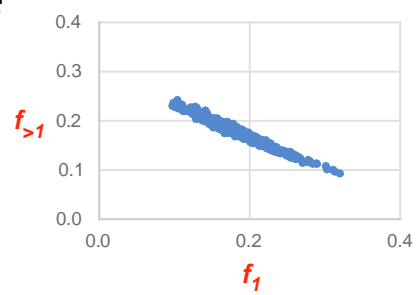**G**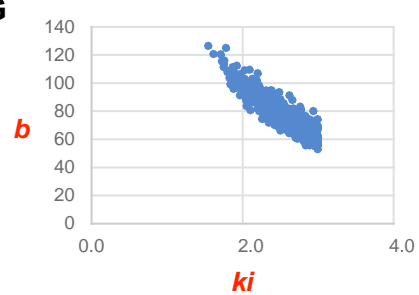

Supplement: s1 [file s1]
